# Supplementary material for: Gut Microbiota Affects Host Fitness of Fall Armyworm Feeding on Different Food Types
Source: MDPI journal article supplement (doi:10.3390/insects15050304), 2024-04-24
Supplement: s1 [file s1]

**Table S1.** Artificial diet formulation for FAWs.

| Compositions              | Dosage for one serving (g) (mL)* |
|---------------------------|----------------------------------|
| Soybean flour             | 80 g                             |
| Wheat germ flour          | 150 g                            |
| Yeast powder              | 30 g                             |
| Sorbic acid               | 3 g                              |
| Casein                    | 40 g                             |
| Agar                      | 20 g                             |
| Ascorbic acid             | 3 g                              |
| Multi-Vitamins solution** | 2.5 mL                           |
| Formaldehyde              | 2 mL                             |
| Acetic acid               | 4 mL                             |
| Distilled water           | 1400 mL                          |

Notes: \* The steps for preparing a single artificial diet are as follows: (1) Weigh and mix soybean flour, wheat germ flour, yeast powder, sorbic acid, and casein according to the prescribed dosage. (2) Prepare a solution of ascorbic acid and multivitamins by dissolving them in 100 mL of distilled water according to the prescribed dosage. (3) Weigh AGAR according to the prescribed dosage, pour it into 1300 mL of distilled water, heat until boiling, then turn off the heat. (4) Pour the mixture from step 1 into the boiled AGAR solution, stir well, then add formaldehyde and acetic acid according to the prescribed dosage and stir again. (5) After allowing slight cooling of the mixture from step 4, fully incorporate the mixed solution from step 2 into it by stirring thoroughly. Then pour this mixture into a mold and cool it at 4°C. Depending on requirements, each component's amount can be proportionally scaled up or down to prepare an artificial diet with desired weight.

\*\* The preparation method for the multivitamin solution is as follows: Weigh vitamins B3 (2.75g), B5 (2.75g), B2 (1.38g), B1 (0.69g), B6 (0.69g), BC (0.69g), H (0.55g) and B12 (5.40mg); add distilled water; stir thoroughly to dissolve; and adjust the volume to 100mL. Store at 4 °C for later use.

**Table S2.** Statistical table of raw and valid data for 16s rDNA sequencing of gut samples from FAWs larvae feeding on different food types.

| Sample  | Raw_Tags | Raw_Bases | Valid_Tags | Valid_Bases | Valid% | Q20%  | Q30%  | GC%   |
|---------|----------|-----------|------------|-------------|--------|-------|-------|-------|
| AD_1    | 85112    | 21.36M    | 85112      | 21.36M      | 100.00 | 99.19 | 96.94 | 54.18 |
| AD_2    | 83164    | 20.87M    | 83164      | 20.87M      | 100.00 | 99.10 | 96.58 | 54.18 |
| AD_3    | 84245    | 21.15M    | 84245      | 21.15M      | 100.00 | 99.17 | 96.80 | 54.18 |
| AD_4    | 82580    | 20.73M    | 82580      | 20.73M      | 100.00 | 99.17 | 96.79 | 54.18 |
| AD_5    | 83124    | 20.86M    | 83124      | 20.86M      | 100.00 | 99.26 | 97.09 | 54.18 |
| Maize_1 | 80553    | 20.22M    | 80553      | 20.22M      | 100.00 | 98.64 | 95.32 | 54.30 |
| Maize_2 | 80874    | 20.30M    | 80874      | 20.30M      | 100.00 | 98.53 | 95.05 | 54.13 |
| Maize_3 | 84337    | 21.17M    | 84337      | 21.17M      | 100.00 | 98.65 | 95.30 | 54.64 |
| Maize_4 | 81882    | 20.55M    | 81882      | 20.55M      | 100.00 | 98.58 | 95.19 | 54.27 |
| Maize_5 | 78396    | 19.68M    | 78396      | 19.68M      | 100.00 | 98.59 | 95.22 | 54.37 |
| Wheat_1 | 82449    | 20.69M    | 82449      | 20.69M      | 100.00 | 99.21 | 96.96 | 54.19 |
| Wheat_2 | 80913    | 20.31M    | 80913      | 20.31M      | 100.00 | 99.13 | 96.73 | 53.68 |
| Wheat_3 | 79190    | 19.88M    | 79190      | 19.88M      | 100.00 | 99.13 | 96.57 | 54.18 |
| Wheat_4 | 79696    | 20.00M    | 79696      | 20.00M      | 100.00 | 99.24 | 97.06 | 54.09 |
| Wheat_5 | 84526    | 21.22M    | 84526      | 21.22M      | 100.00 | 99.24 | 97.09 | 54.18 |
| Rice_1  | 80716    | 20.26M    | 80716      | 20.26M      | 100.00 | 99.14 | 96.65 | 54.21 |
| Rice_2  | 82310    | 20.66M    | 82310      | 20.66M      | 100.00 | 98.75 | 95.51 | 54.21 |
| Rice_3  | 82255    | 20.65M    | 82255      | 20.65M      | 100.00 | 97.92 | 93.47 | 54.13 |
| Rice_4  | 82184    | 20.63M    | 82184      | 20.63M      | 100.00 | 99.02 | 96.34 | 54.22 |
| Rice_5  | 79114    | 19.86M    | 79114      | 19.86M      | 100.00 | 99.22 | 96.93 | 54.41 |

Notes: 'AD' stands for Artificial Diet. For four groups of different food types, each group had 5 samples. Valid%, percentage representation of the ratio between valid data and raw data. Q20%, proportion of data with data quality  $\geq$  Q20 in the Valid. Q30%, proportion of data with data quality  $\geq$  Q30 in the Valid. GC%, GC content in the Valid.

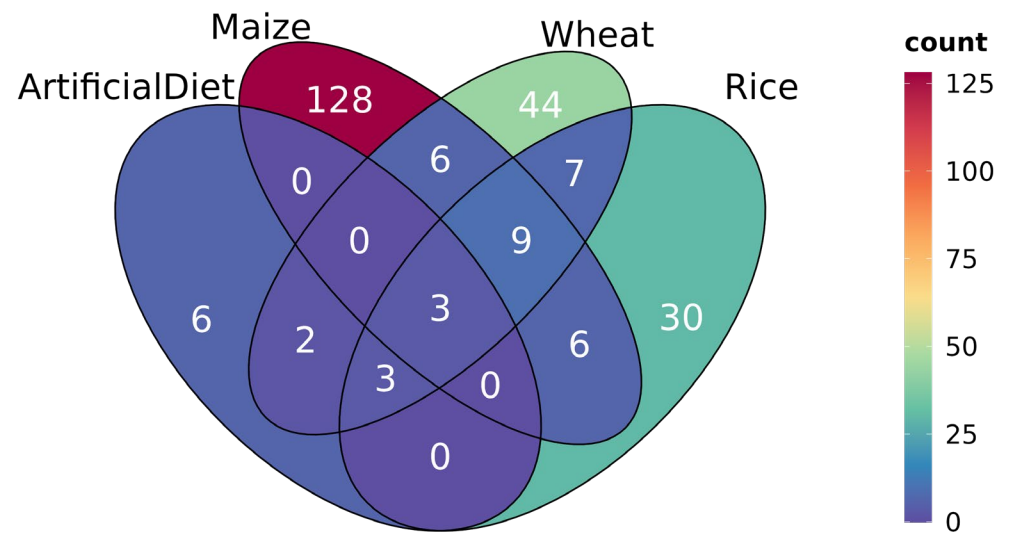

**Figure S1.** Venn diagrams of features shared among the guts of FAWs larvae feeding on different food types.

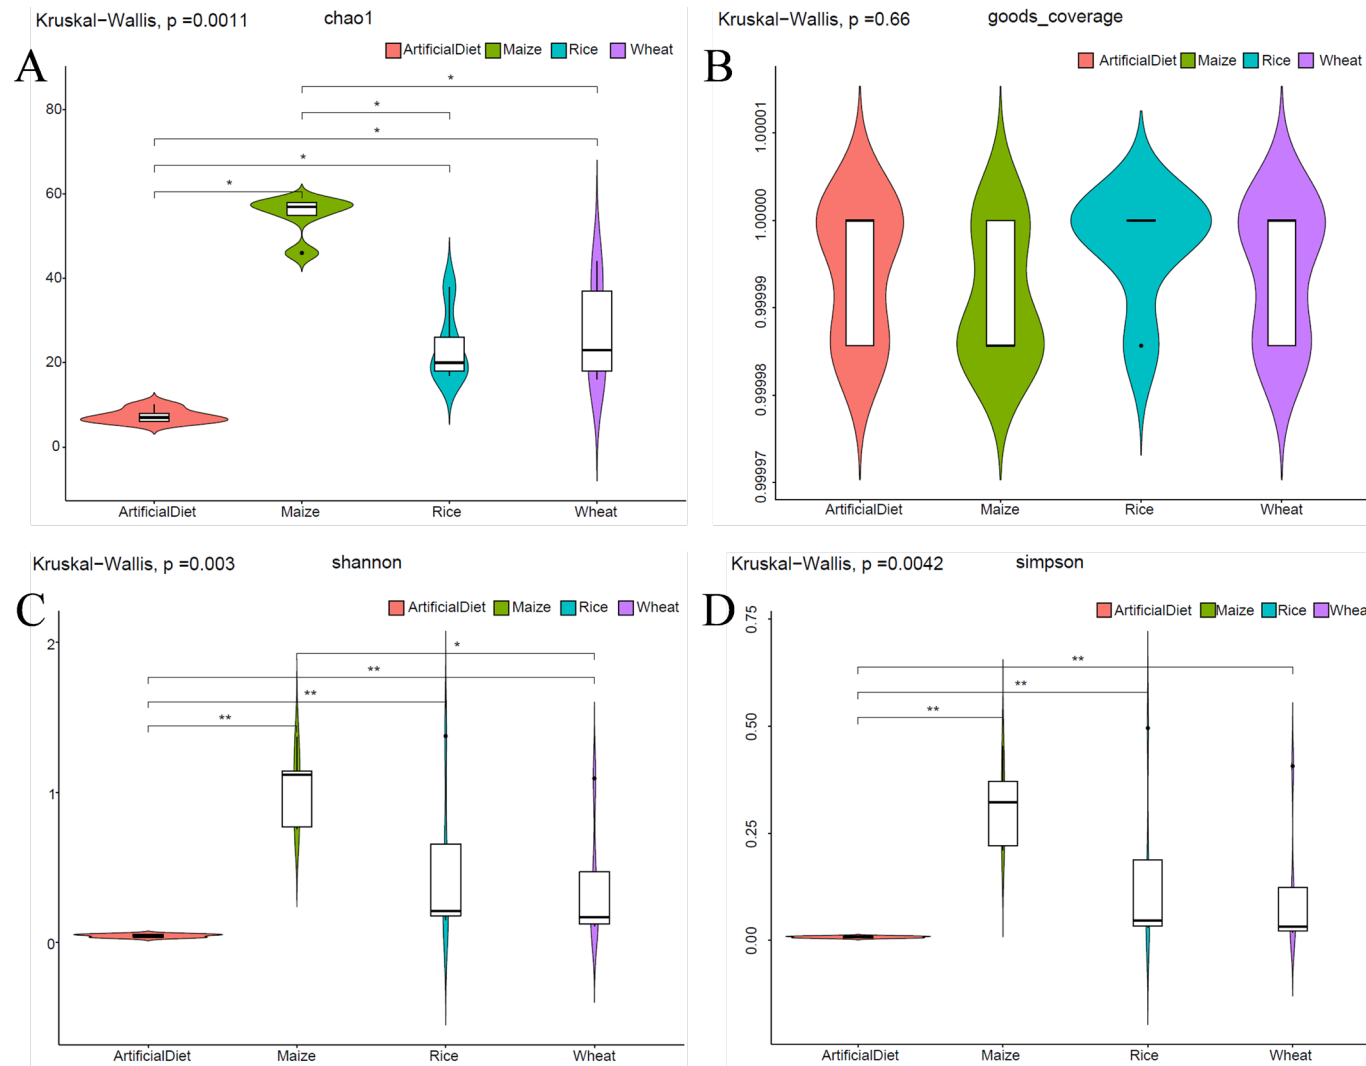

**Figure S2.**  $\alpha$ -diversity of gut bacteria in FAWs feeding on different food types. (A) Significant differences in the Chao index (richness estimator). (B) Significant differences in the Good-coverage index (depth estimator). (C) Significant differences in the Shannon index (diversity estimator). (D) Significant differences in the Simpson index (richness and evenness estimator) (Wilcoxon test; ns: not significant [ $P < 0.05$ ], \*  $P < 0.05$ , \*\*  $P < 0.01$ ).

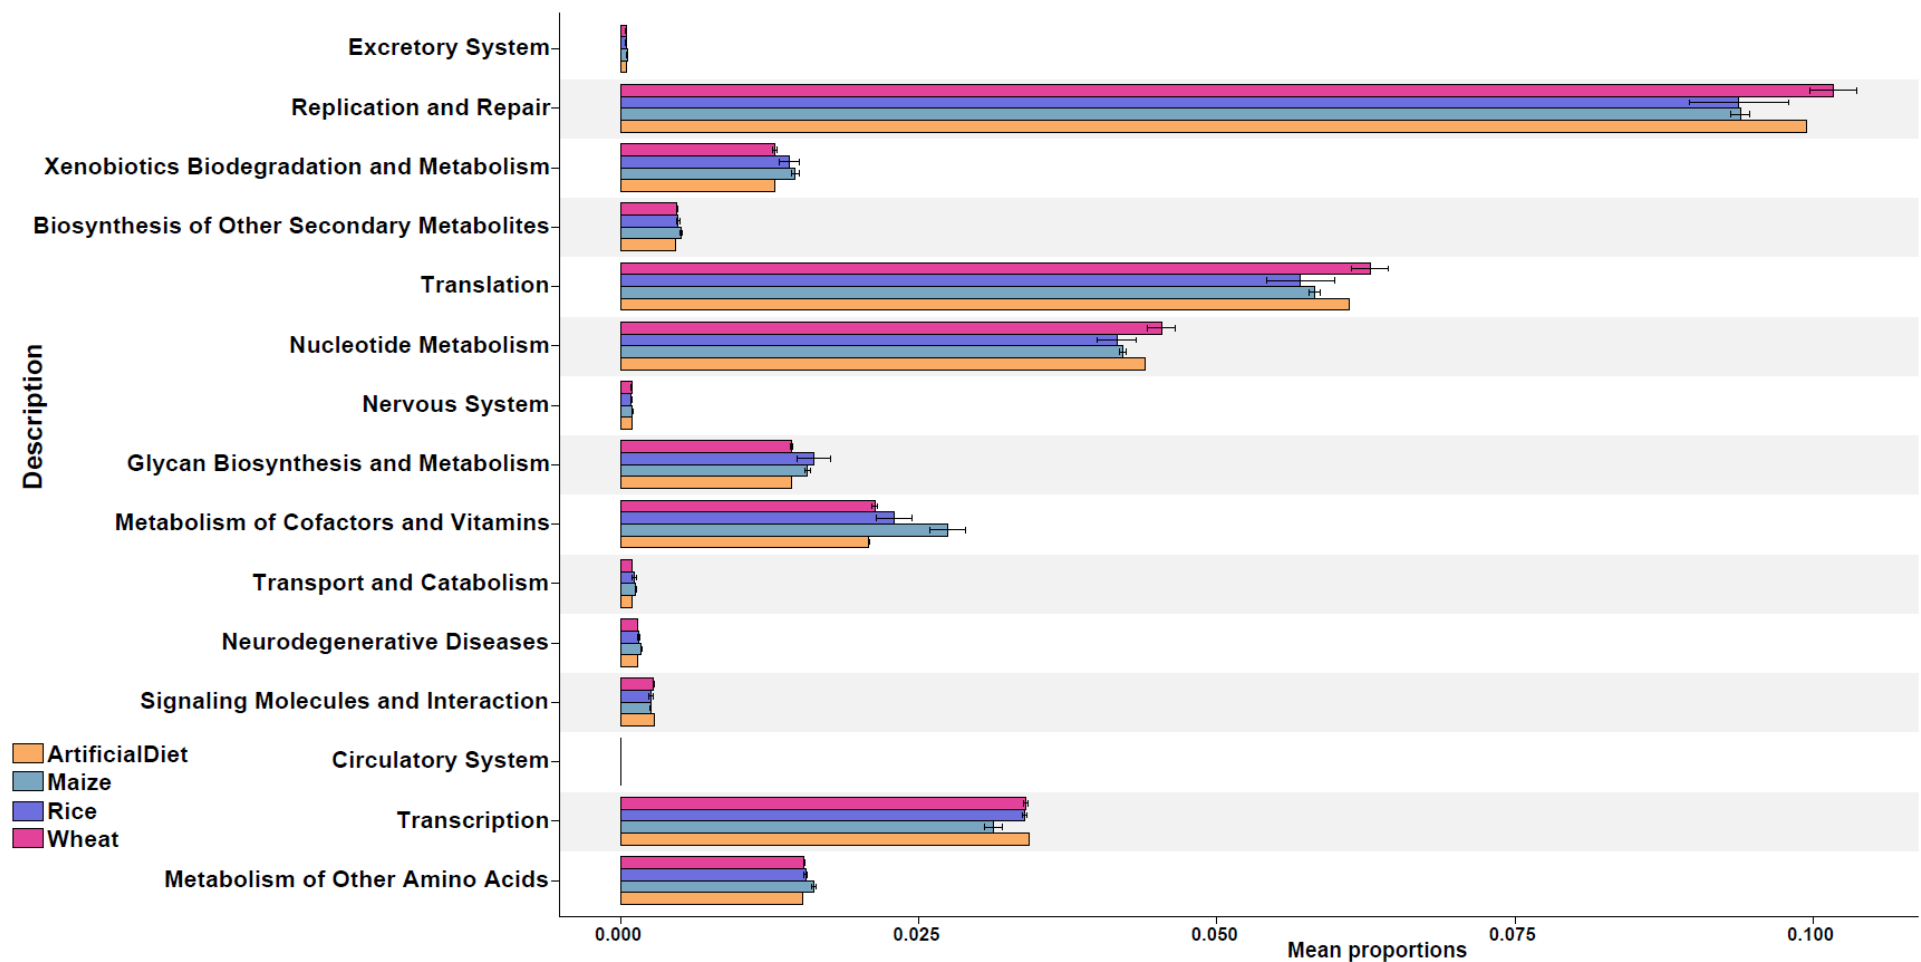

Figure S3. PICRUSt2 functional prediction of FAW gut bacteria at KEGG level2 (t-test,  $p < 0.05$ ).
